# Supplementary material for: Catalytic Combustion of Toluene over Highly Dispersed Cu-CeOx Derived from Cu-Ce-MOF by EDTA Grafting Method
Source: MDPI journal article supplement (doi:10.3390/catal11040519), 2021-04-20
Supplement: s1 [file s1]

# Supplementary Materials: Catalytic Combustion of Toluene over Highly Dispersed Cu-CeO<sub>x</sub> Derived from Cu-Ce-MOF by EDTA Grafting Method

Wenjie Sun, Yijia Huang, Xiaomin Li, Zhen Huang, Hualong Xu and Wei Shen \*

Collaborative Innovation Center of Chemistry for Energy Materials, Shanghai Key Laboratory of Molecular Catalysis and Innovative Materials and Laboratory of Advanced Materials, Department of Chemistry, Fudan University, Shanghai 200433, China; wjsun17@fudan.edu.cn (W.S.); yjhuang20@fudan.edu.cn (Y.H.); xml17@fudan.edu.cn (X.L.); huangzhen@fudan.edu.cn (Z.H.); shuhl@fudan.edu.cn (H.X.)

\* Correspondence: wshen@fudan.edu.cn.

**Table S1.** The inventory rating in the synthesis of Cu-Ce-MOF-n.

| Cu-Ce-MOF-n                                                                                                                                                                                                                                                                                                           |             |                                        |
|-----------------------------------------------------------------------------------------------------------------------------------------------------------------------------------------------------------------------------------------------------------------------------------------------------------------------|-------------|----------------------------------------|
|                                                                                                                                                                                                                                      |             |                                        |
| Copyright: © 2021 by the authors. Licensee MDPI, Basel, Switzerland. This article is an open access article distributed under the terms and conditions of the Creative Commons Attribution (CC BY) license ( <a href="http://creativecommons.org/licenses/by/4.0/">http://creativecommons.org/licenses/by/4.0/</a> ). | EDTA-2Na /g | CuAc <sub>2</sub> ·H <sub>2</sub> O /g |
| Cu-Ce-MOF-0.05                                                                                                                                                                                                                                                                                                        | 0.213       | 0.127                                  |
| Cu-Ce-MOF-0.1                                                                                                                                                                                                                                                                                                         | 0.426       | 0.253                                  |
| Cu-Ce-MOF-0.2                                                                                                                                                                                                                                                                                                         | 0.853       | 0.506                                  |
| Cu-Ce-MOF-0.3                                                                                                                                                                                                                                                                                                         | 1.279       | 0.760                                  |
| Cu-Ce-MOF-0.4                                                                                                                                                                                                                                                                                                         | 1.704       | 1.012                                  |

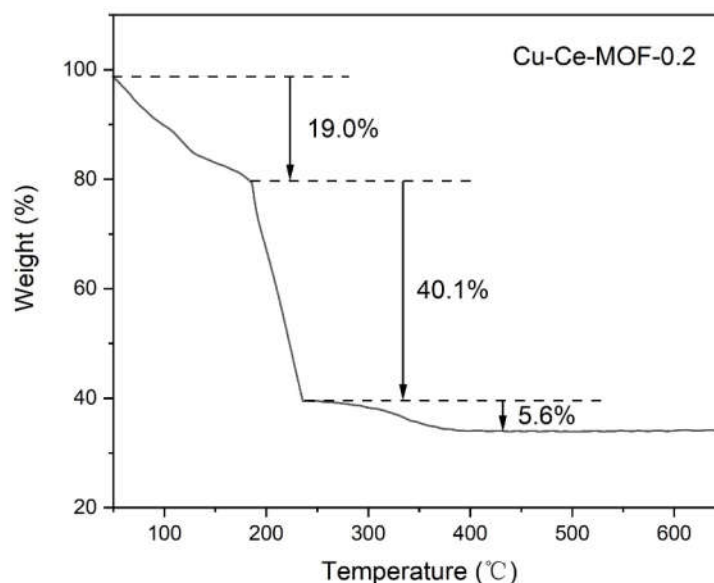

**Figure S1.** The thermogravimetry curves of Cu-Ce-MOF-0.2.

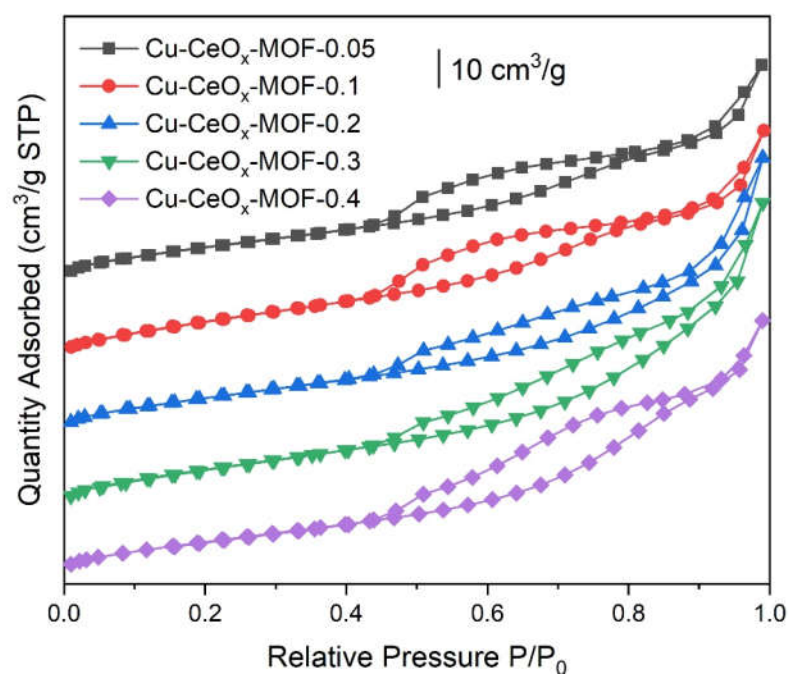

Figure S2. The  $N_2$  adsorption and desorption isotherms of Cu-CeO<sub>x</sub>-MOF-n.

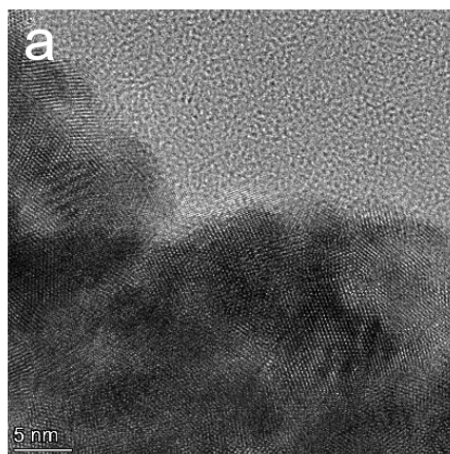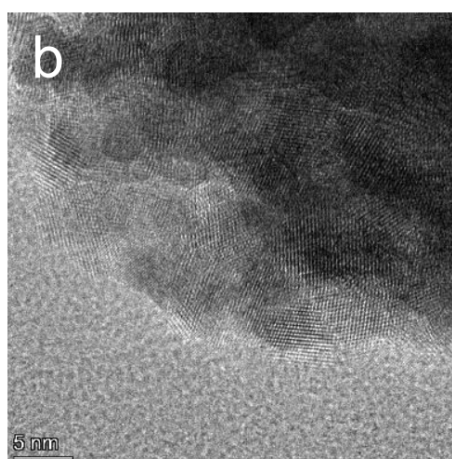

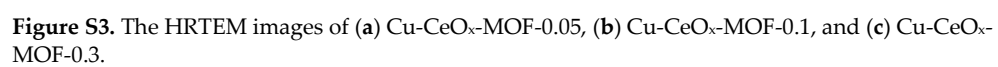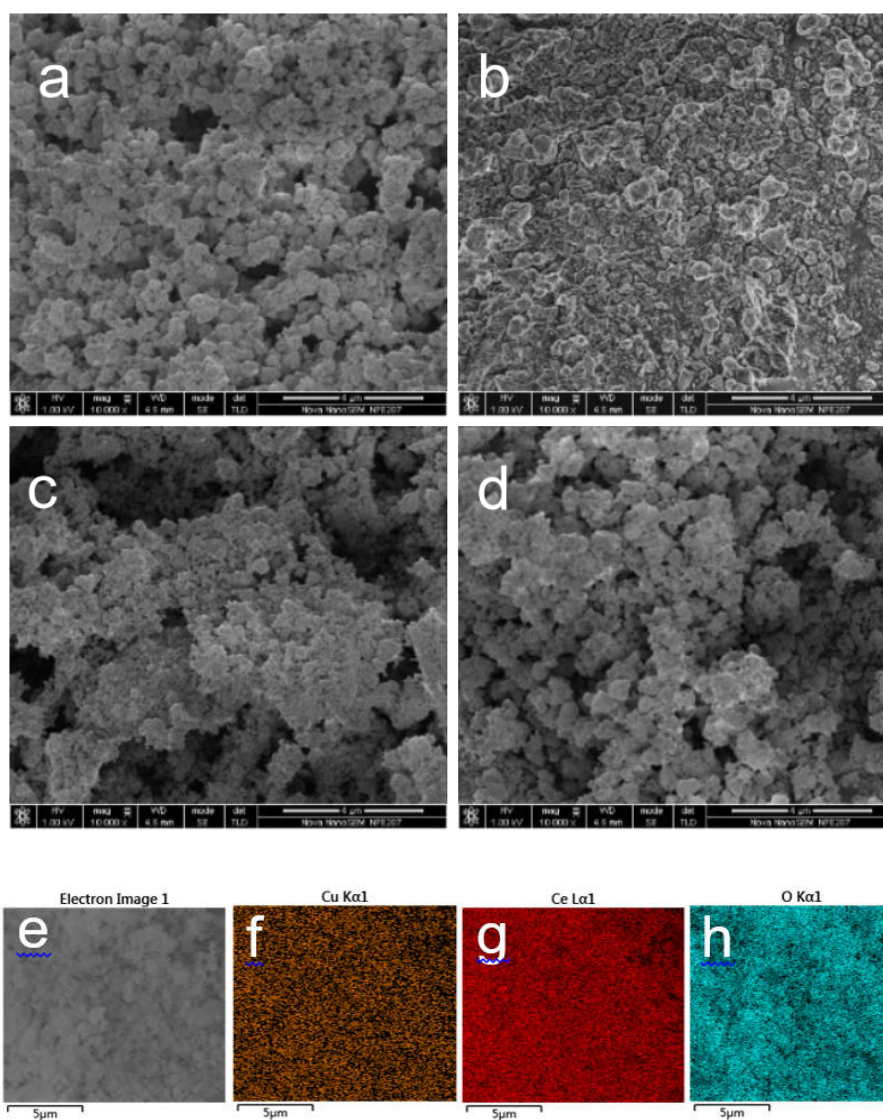

**Figure S4.** The FESEM images of (a) Cu-CeO<sub>x</sub>-MOF-0.05, (b) Cu-CeO<sub>x</sub>-MOF-0.1, (c) Cu-CeO<sub>x</sub>-MOF-0.3, (d) Cu-CeO<sub>x</sub>-MOF-0.4; (e–h) EDS mapping results of Cu-CeO<sub>x</sub>-MOF-0.2 ((f) Cu, (g) Ce, and (h) O).

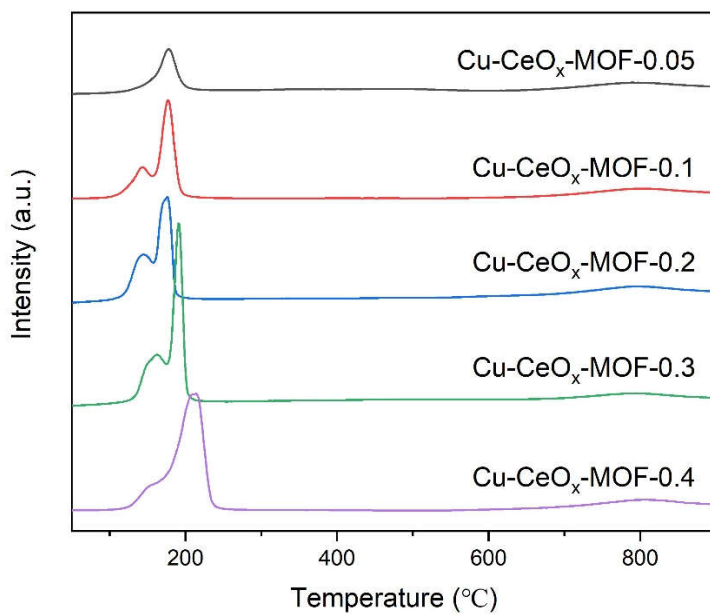

**Figure S5.** The whole H<sub>2</sub>-TPR profiles of Cu-CeO<sub>x</sub>-MOF-n.

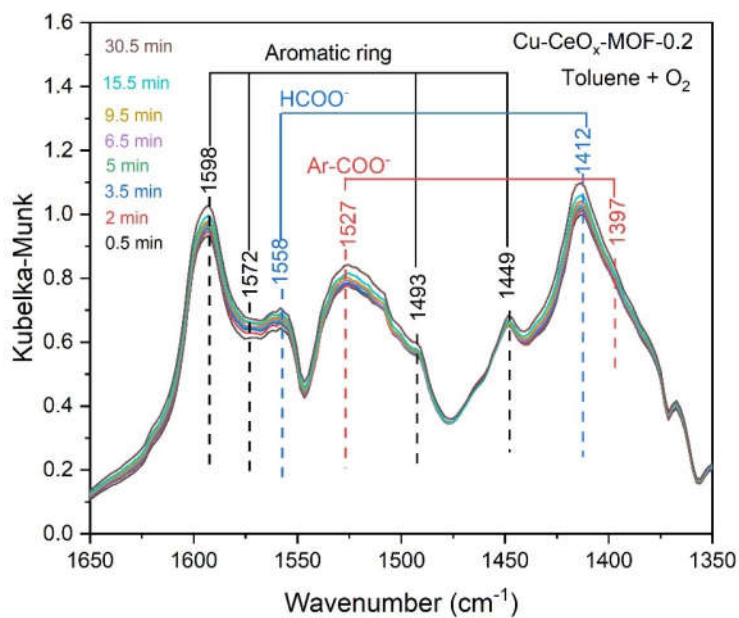

**Figure S6.** *In situ* DRIFTS results after O<sub>2</sub> introduction over Cu-CeO<sub>x</sub>-MOF-0.2 at the range of 1650 cm<sup>−1</sup> – 1350 cm<sup>−1</sup>.
